1 **Intrahost evolution and forward transmission of a novel SARS-CoV-2 Omicron**  
2 **BA.1 subvariant**

3

4 Ana S. Gonzalez-Reiche<sup>1</sup>, Hala Alshammary<sup>2</sup>, Sarah Schaefer<sup>3</sup>, Gopi Patel<sup>3</sup>, Jose  
5 Polanco<sup>2,4</sup>, Angela A. Amoako<sup>2,4</sup>, Aria Rooker<sup>2,4</sup>, Christian Cognigni<sup>2,4</sup>, Daniel Floda<sup>1</sup>,  
6 Adriana van de Guchte<sup>1</sup>, Zain Khalil<sup>1</sup>, Keith Farrugia<sup>1</sup>, Nima Assad<sup>5</sup>, Jian Zhang<sup>1</sup>,  
7 Bremy Albuquerque<sup>1,5</sup>, Levy Sominsky<sup>2,4</sup>, Komal Srivastava<sup>2,4</sup>, Robert Sebra<sup>1,8,9,10</sup>,  
8 Juan David Ramirez<sup>6,11</sup>, Radhika Banu<sup>6</sup>, Paras Shrestha<sup>6</sup>, Alberto Paniz-Mondolfi<sup>6</sup>,  
9 Emilia Mia Sordillo<sup>6</sup> †, Viviana Simon<sup>2,3,4,6,7</sup>, †, Harm van Bakel<sup>1,6,8,†</sup>

10

11 1. Department of Genetics and Genomic Sciences, Icahn School of Medicine at Mount  
12 Sinai, New York, NY 10029, USA

13 2. Department of Microbiology, Icahn School of Medicine at Mount Sinai, New York, NY  
14 10029, USA

15 3. Division of Infectious Diseases, Department of Medicine, Icahn School of Medicine  
16 at Mount Sinai, New York, NY 10029, USA

17 4. Center for Vaccine Research and Pandemic Preparedness (C-VARPP), Icahn  
18 School of Medicine at Mount Sinai, New York, NY, USA

19 5. Graduate School of Biomedical Sciences, Icahn School of Medicine at Mount Sinai,  
20 New York, NY 10029, USA

21 6. Department of Pathology, Molecular, and Cell-Based Medicine, Icahn School of  
22 Medicine at Mount Sinai, New York, NY 10029, USA

23 7. The Global Health and Emerging Pathogens Institute, Icahn School of Medicine at  
24 Mount Sinai, New York, NY 10029, USA

25 8. Icahn Genomics Institute, Icahn School of Medicine at Mount Sinai, New York, NY  
26 10029, USA

27 9. Black Family Stem Cell Institute, Icahn School of Medicine at Mount Sinai, New  
28 York, NY, 10029, USA

29 10. Sema4, a Mount Sinai venture, Stamford CT, 06902

30 11. Centro de Investigaciones en Microbiología y Biotecnología-UR (CIMBIUR),  
31 Facultad de Ciencias Naturales, Universidad del Rosario, Bogotá, Colombia.

32

33 Corresponding authors/senior authors:

34 † Dr. Emilia Mia Sordillo (Emilia.Sordillo@mountsinai.org), Dr. Viviana Simon  
35 (viviana.simon@mssm.edu) and Dr. Harm van Bakel (harm.vanbakel@mssm.edu)

36 **ABSTRACT**

37 Persistent SARS-CoV-2 infections have been reported in immune-compromised  
38 individuals and people undergoing immune-modulatory treatments. It has been  
39 speculated that the emergence of antigenically diverse SARS-CoV-2 variants such as  
40 the Omicron variant may be the result of intra-host viral evolution driven by suboptimal  
41 immune responses, which must be followed by forward transmission. However, while  
42 intrahost evolution has been documented, to our knowledge no direct evidence of  
43 subsequent forward transmission is available to date.

44 Here we describe the emergence of an Omicron BA.1 sub-lineage with 8  
45 additional amino acid substitutions within the spike (E96D, L167T, R346T, L455W,  
46 K458M, A484V, H681R, A688V) in an immune-compromised host along with evidence  
47 of 5 forward transmission cases. Our findings show that the Omicron BA.1 lineage can  
48 further diverge from its exceptionally mutated genome during prolonged SARS-CoV-2  
49 infection; highlighting an urgent need to employ therapeutic strategies to limit duration of  
50 infection and spread in vulnerable patients.

51

## 52 INTRODUCTION

53 Emergence of antigenically diverse SARS-CoV-2 variants of concern (VOC) poses a  
54 challenge to SARS-CoV-2 vaccine-induced immunity. Prolonged evolution in  
55 immunocompromised hosts is thought to have played a role in the emergence of  
56 several SARS-CoV-2 VOC such as Alpha and Omicron<sup>1,2</sup>. However, although persistent  
57 SARS-CoV-2 replication with stepwise acquisition of mutations in spike within  
58 immunocompromised COVID-19 patients has been documented<sup>3-7</sup>, clear evidence for  
59 forward transmission has been lacking.

60 The Mount Sinai Pathogen Surveillance Program (MS-PSP) has profiled the evolving  
61 landscape of SARS-CoV-2 in New York City (NYC) since the beginning of the  
62 pandemic<sup>8,9</sup>. We routinely perform complete viral genome sequencing from at least 10%  
63 of randomly selected contemporaneous SARS-CoV-2 positive specimens collected from  
64 patients seeking care at our health system.

65 We describe a persistent SARS-CoV-2 Omicron BA.1 infection in an immuno-  
66 compromised individual during a 12-week period and document the accumulation of  
67 eight additional amino acid substitutions in the already antigenically distinct Omicron  
68 BA.1 spike protein. In addition, we identified five subsequent cases harboring the same  
69 genotype; three of which were identified in the same health system. The presence of the  
70 unique combination of mutations in all six cases is indicative of forward transmission of  
71 this novel Omicron BA.1 sub-lineage. Although the majority of amino acid changes  
72 occur at positions known to confer either immune escape<sup>10,11</sup> or altered viral  
73 fusogenicity<sup>12-14</sup>, some of the mutations have rarely been seen in other lineages, and  
74 their overall constellation is unique.

## 75 **MATERIALS AND METHODS**

### 76 Molecular SARS-CoV-2 diagnostics

77 SARS-CoV-2 molecular diagnostic testing was performed in the Molecular Microbiology  
78 Laboratories of the MSHS Clinical Laboratory by nucleic acid amplification tests (NAAT)  
79 that have been validated for nasopharyngeal, anterior nares swabs and saliva  
80 specimens. All but one positive samples included in this study were tested using the  
81 PerkinElmer® New Coronavirus Nucleic Acid Detection Kit which provides qualitative  
82 detection of nucleic acid from SARS-CoV-2. It includes two SARS-CoV-2 targets  
83 (ORF1ab, N) and one internal positive control (IC; bacteriophage MS2). Cycle threshold  
84 (Ct) values are generated for all three targets and provide a quantitative estimate of the  
85 viral load. The only other positive sample that was run on another testing platform was  
86 the first specimen of the index case (P1). It was tested as a point of care test (POC)  
87 using the LIAT SARS-CoV-2 assay, and the biospecimen was discarded prior to  
88 transfer to the MS-PSP. In addition, two other negative specimens registered for patient  
89 P3 during the same time window were run in the LumiraDx assay, which does not  
90 provide Ct values.

91

### 92 The Mount Sinai Pathogen Surveillance Program (MS-PSP)

93 Residual nasopharyngeal and anterior nares (AN) swab specimens were collected after  
94 completion of the diagnostic process, as part of the Mount Sinai Pathogen Surveillance  
95 Program (IRB approved HS#13-00981).

96

### 97 Complete SARS-CoV-2 genome sequencing

98 RNA was extracted using the Chemagic™ Viral DNA/RNA 300 Kit H96 (PerkinElmer,  
99 CMG-1033-S) on the automated Chemagic™ 360 instrument (PerkinElmer, 2024-0020)  
100 from 300uL of viral transport media per the manufacturer's protocol. cDNA synthesis  
101 followed by whole genome amplification with two custom primer panel sets targeting 1.5  
102 and 2kb regions across the SARS-CoV-2 genome was performed as previously  
103 described<sup>8</sup> with addition of new oligonucleotides to minimize amplicon dropout for

104 Omicron lineages derived from PANGO lineage B.1.1.529 (available on request).  
105 Paired-end (2x150bp) Nextera XT (Illumina, cat. FC-131-1096) libraries prepared from  
106 amplicons were sequenced on a MiSeq instrument. SARS-CoV-2 genomes were  
107 assembled using a custom reference-based pipeline as previously described<sup>8</sup>. The final  
108 sequencing depth per genome ranged between ~135k to ~415k reads.

109

### 110 Phylogenetic analysis

111 Global background SARS-CoV-2 sequences were downloaded from the GISAID  
112 EpiCOV database (as of 2022-05-13). The GISAID database was queried for the novel  
113 mutations observed in P1-P4 sequences in order to identify their closest matches.  
114 Sequence hits were confirmed by their Mash distance<sup>15</sup>. For this, a genome sketch was  
115 generated from the sanitized alignment of the global sequences filtered for lineages  
116 BA.1.\* as produced by Nextstrain<sup>16,17</sup> v11 for SARS-CoV-2 with default parameters  
117 (<https://github.com/nextstrain/ncov>). This allowed pairwise comparisons of our data with  
118 high-quality global sequences with available metadata. Phylogenetic inferences of the  
119 MS-PSP SARS-CoV-2 genomes, including the closest sequence matches and all other  
120 BA.\* lineage sequences from the MS-PSP surveillance program were done using an  
121 Omicron BA.\* and New York State-focused background with proximity subsampling  
122 scheme with Nextstrain. Clade and lineage assignments were done with Nextclade CLI  
123 v3.2 (2021-11-04)<sup>18</sup> and with PANGO-v1.8 (pangolin v3.1.17, pangoleARN v.2022-04-  
124 22)<sup>19,20</sup>.

125

### 126 Viral cultures

127 Replication-competent SARS-CoV-2 was obtained as previously described<sup>21</sup>. Briefly,  
128 Vero-E6 cells expressing TMPRSS2 were cultured in Dulbecco's Modified Eagle  
129 Medium containing 10% heat-inactivated fetal bovine serum and 1% Minimum Essential  
130 Medium (MEM) Amino Acids Solution, supplemented with 100 U/ml penicillin, 100 µg/ml  
131 streptomycin, 100 µg/ml normocin, and 3 µg/ml puromycin. 200ul of viral transport  
132 media from the nasopharyngeal or anterior nares swab specimen was added to Vero-

133 E6-TMPRSS2 cells in culture media supplemented with 0.5 µg/ml Amphotericin B.  
134 Cultures were maintained for 10 days. Culture supernatants were collected and clarified  
135 by centrifugation (4000g, 5min) upon the appearance of cytopathic effect (CPE). The  
136 viral stocks were sequence-verified. Viral cultures were successful for the initial  
137 specimens obtained from P2, P3 and P4, but failed for all P1 specimens.

138

## 139 **RESULTS AND DISCUSSION**

140 In this study we report the genomic analysis of serially collected nasopharyngeal (NP)  
141 and anterior nares (AN) samples from an immunocompromised patient with persistent  
142 SARS-CoV-2 Omicron BA1 replication between December 2021 and March 2022. Over  
143 a 12-week period, we documented the accumulation of eight amino acid substitutions in  
144 the spike N-terminal domain (NTD), the receptor binding domain (RBD), and cleavage  
145 site region (CSR) (**Figure 1**) within the same patient. The first three mutations R346T,  
146 K458M and E484V were detected simultaneously 40 days after initial SARS-CoV-2  
147 diagnosis and were fixed. Two weeks later (day 64), L167T and the furin cleavage site  
148 mutation P681Y were detected in addition to three mutations listed. During the following  
149 weeks (day 72 and day 81), two different viral populations emerged each carrying  
150 shared (L455W) as well as additional distinct signature mutations (E96D at day 72,  
151 S477D at day 81). The majority of the amino acid substitutions that accumulated in  
152 spike have been associated with neutralization escape<sup>10,11</sup> or improved viral  
153 fusogenicity<sup>12</sup>. All but one of the mutations observed in the consensus sequences  
154 outside the spike gene were non-synonymous, further supporting positive intrahost  
155 selection of spike changes with competitive advantage.

156 Background health system-wide SARS-CoV-2 genomic surveillance by MS-PSP  
157 conducted during the same time period identified three other patients with COVID-19  
158 harboring SARS-CoV-2 Omicron variants that were similar to that of the index case and  
159 consistent with multiple forward transmissions based on the timeline of infection (**Figure**  
160 **1**, and see **Table 1** and **Figure 2** for details and the CT values for the individual  
161 specimens). These three forward transmissions were detected in immunocompromised  
162 individuals. In one case, infection persisted for more than three weeks resulting in

163 acquisition of an additional mutation in the spike RBD (V445A) (**Figure 1**). In some  
164 specimens we detected minority alleles at variant positions suggesting ongoing intra-  
165 host selection (**Figure 1** and **Figure 3**). Although viral isolation failed for specimens  
166 available for the index case, we successfully cultured SARS-CoV-2 from the initial  
167 positive specimens of the three forward transmission cases, confirming the transmission  
168 of replication-competent virus.

169 Lastly, two additional related SARS-CoV-2 genomes from the NYC area were identified  
170 from the GISAID database (**Figure 1**). Based on the metadata provided, these two  
171 cases differed by age and gender from our cases, consistent with limited community  
172 spread of this new Omicron BA1 sub-variant. All transmission cases contained one  
173 synonymous change in Orf1a (T6001C) previously only observed at day 72 in the index  
174 case (**Figure 4**), narrowing the time window of the first transmission to a few weeks  
175 following day 64. As of mid-May 2022, the most recent case was detected in mid-April  
176 2022 and the last SARS-CoV-2 positive specimen from a forward transmission was  
177 collected in early May 2022.

178 In conclusion, our data demonstrate that intra-host evolution of SARS-CoV-2 occurring  
179 during persistent infection in immunocompromised individuals can drive the emergence  
180 and spread of novel (sub)variants with extensive mutations in key antigenic regions,  
181 even in the context of the already highly divergent Omicron lineage. Our data suggest  
182 that genomic monitoring of persistent long-term infections is warranted and further  
183 underscore the need to limit the duration of viral infection. Improved early detection of  
184 novel SARS-CoV-2 variants, a better understanding of the selection processes driving  
185 SARS-CoV-2 evolution, and therapies that limit virus persistence and shedding are  
186 essential to reduce emergence of highly mutated viral variants in the future.

187

## 188 **ACKNOWLEDGMENTS**

189 We thank the Mount Sinai Hospital and School Leadership, in particular Dr. David Reich  
190 and Dr. Dennis Charney, for their ongoing support of the MS-PSP throughout the  
191 pandemic. We thank the laboratory technicians in the Molecular Microbiology  
192 Laboratories and the Rapid Response Laboratories of the Mount Sinai Health System

193 since without their assistance and help, none of this surveillance work would be  
194 possible.

195 We gratefully acknowledge the authors and originating and submitting laboratories of  
196 sequences from GISAID's EpiCoV ([www.gisaid.org](http://www.gisaid.org)) that were used as background for  
197 our phylogenetic inferences.

198

#### 199 **FUNDING SOURCES**

200 The work reported was in part supported by a contract from the *National Institute of*  
201 *Allergy and Infectious Diseases* (75N93021C00014, Option 12A) awarded to the Center  
202 for Research on Influenza Pathogenesis and Transmission – (a Center of Excellence for  
203 Influenza Research and Response) as part of the *SARS-CoV-2 Assessment of Viral*  
204 *Evolution (SAVE) Program*, a contract from the *National Institute of Allergy and*  
205 *Infectious Diseases* (HHSN272201400008C) awarded to the Center for Research on  
206 Influenza Pathogenesis – (a Center of Excellence for Influenza Research and  
207 Surveillance), philanthropic donations from the *JPB Foundation*, a research grant  
208 (2020-215611 [5384]) from the *Open Philanthropy Project*, and awards (S10OD026880  
209 and S10OD030463) from the *NIH Office of Research Infrastructure Programs*.

210

#### 211 **COMPETING INTERESTS**

212 The Icahn School of Medicine at Mount Sinai has filed patent applications relating to  
213 SARS-CoV-2 serological assays listing Viviana Simon as co-inventor. Mount Sinai has  
214 spun out a company, Kantaro, to market serological tests for SARS-CoV-2. Robert  
215 Sebra is VP of Technology Development and a stockholder at Sema4, a Mount Sinai  
216 Venture. This work, however, was conducted solely at Icahn School of Medicine at  
217 Mount Sinai.

218



219 **REFERENCES**

- 220 1. Martin DP, Lytras S, Lucaci AG, et al. Selection analysis identifies unusual  
221 clustered mutational changes in Omicron lineage BA.1 that likely impact Spike  
222 function. *bioRxiv* 2022:2022.01.14.476382. DOI: 10.1101/2022.01.14.476382.
- 223 2. (CoG-UK) C-GCU. Preliminary genomic characterisation of an emergent SARS-  
224 CoV-2 lineage in the UK defined by a novel set of spike mutations.  
225 ([https://virological.org/t/preliminary-genomic-characterisation-of-an-emergent-  
226 sars-cov-2-lineage-in-the-uk-defined-by-a-novel-set-of-spike-mutations/563](https://virological.org/t/preliminary-genomic-characterisation-of-an-emergent-sars-cov-2-lineage-in-the-uk-defined-by-a-novel-set-of-spike-mutations/563)).
- 227 3. Corey L, Beyrer C, Cohen MS, Michael NL, Bedford T, Rolland M. SARS-CoV-2  
228 Variants in Patients with Immunosuppression. *N Engl J Med* 2021;385(6):562-  
229 566. DOI: 10.1056/NEJMs2104756.
- 230 4. Avanzato VA, Matson MJ, Seifert SN, et al. Case Study: Prolonged Infectious  
231 SARS-CoV-2 Shedding from an Asymptomatic Immunocompromised Individual  
232 with Cancer. *Cell* 2020;183(7):1901-1912 e9. DOI: 10.1016/j.cell.2020.10.049.
- 233 5. Choi B, Choudhary MC, Regan J, et al. Persistence and Evolution of SARS-CoV-  
234 2 in an Immunocompromised Host. *N Engl J Med* 2020;383(23):2291-2293. DOI:  
235 10.1056/NEJMc2031364.
- 236 6. Kemp SA, Collier DA, Datir RP, et al. SARS-CoV-2 evolution during treatment of  
237 chronic infection. *Nature* 2021;592(7853):277-282. DOI: 10.1038/s41586-021-  
238 03291-y.
- 239 7. Truong TT, Ryutov A, Pandey U, et al. Increased viral variants in children and  
240 young adults with impaired humoral immunity and persistent SARS-CoV-2  
241 infection: A consecutive case series. *EBioMedicine* 2021;67:103355. DOI:  
242 10.1016/j.ebiom.2021.103355.

- 243 8. Gonzalez-Reiche AS, Hernandez MM, Sullivan MJ, et al. Introductions and early  
244 spread of SARS-CoV-2 in the New York City area. *Science* 2020. DOI:  
245 10.1126/science.abc1917.
- 246 9. Hernandez MM, Gonzalez-Reiche AS, Alshammary H, et al. Molecular evidence  
247 of SARS-CoV-2 in New York before the first pandemic wave. *Nat Commun*  
248 2021;12(1):3463. DOI: 10.1038/s41467-021-23688-7.
- 249 10. Greaney AJ, Starr TN, Barnes CO, et al. Mapping mutations to the SARS-CoV-2  
250 RBD that escape binding by different classes of antibodies. *Nat Commun*  
251 2021;12(1):4196. DOI: 10.1038/s41467-021-24435-8.
- 252 11. Starr TN, Greaney AJ, Hilton SK, et al. Deep Mutational Scanning of SARS-CoV-  
253 2 Receptor Binding Domain Reveals Constraints on Folding and ACE2 Binding.  
254 *Cell* 2020;182(5):1295-1310 e20. DOI: 10.1016/j.cell.2020.08.012.
- 255 12. Escalera A, Gonzalez-Reiche AS, Aslam S, et al. Mutations in SARS-CoV-2  
256 variants of concern link to increased spike cleavage and virus transmission. *Cell*  
257 *Host Microbe* 2022. DOI: 10.1016/j.chom.2022.01.006.
- 258 13. Saito A, Irie T, Suzuki R, et al. Enhanced fusogenicity and pathogenicity of  
259 SARS-CoV-2 Delta P681R mutation. *Nature* 2022;602(7896):300-306. DOI:  
260 10.1038/s41586-021-04266-9.
- 261 14. Meng B, Abdullahi A, Ferreira I, et al. Altered TMPRSS2 usage by SARS-CoV-2  
262 Omicron impacts infectivity and fusogenicity. *Nature* 2022;603(7902):706-714.  
263 DOI: 10.1038/s41586-022-04474-x.

- 264 15. Ondov BD, Treangen TJ, Melsted P, et al. Mash: fast genome and metagenome  
265 distance estimation using MinHash. *Genome Biol* 2016;17(1):132. DOI:  
266 10.1186/s13059-016-0997-x.
- 267 16. Bedford T, Neher R, Hadfield J, et al. Nextstrain build for novel coronavirus  
268 SARS-CoV-2. 2020.
- 269 17. Hadfield J, Megill C, Bell SM, et al. Nextstrain: real-time tracking of pathogen  
270 evolution. *Bioinformatics* 2018;34(23):4121-4123. DOI:  
271 10.1093/bioinformatics/bty407.
- 272 18. Aksamentov IR, Cornelius; Hodcroft, Emma B.; Neher, Richard A. Nextclade:  
273 clade assignment, mutation calling and quality control for viral genomes. *Journal*  
274 *of Open Source Software* 2021;6(67):3773. DOI: 10.21105/joss.03773.
- 275 19. O'Toole Á, McCrone JT. Phylogenetic assignment of named global outbreak  
276 lineages. 2020-05-19 ed2020.
- 277 20. O'Toole A, Hill V, Pybus OG, et al. Tracking the international spread of SARS-  
278 CoV-2 lineages B.1.1.7 and B.1.351/501Y-V2 with grinch. *Wellcome Open Res*  
279 2021;6:121. DOI: 10.12688/wellcomeopenres.16661.2.
- 280 21. Carreno JM, Alshammary H, Tcheou J, et al. Activity of convalescent and  
281 vaccine serum against SARS-CoV-2 Omicron. *Nature* 2022;602(7898):682-688.  
282 DOI: 10.1038/s41586-022-04399-5.  
283

284 **TABLES**

285 **Table 1: Spike mutations detected in the sequenced cases. Mutations are shown relative to BA.1, the lineage of the**  
 286 **earliest sample. Mutations in bold correspond to changes at positions already mutated in BA.1.**

| Patient ID | Sex | Age   | Study Day | GISAIID Accession | Source                                     | Mutations in Spike relative to earliest sample (BA.1)                                                                                                                                                                |         |       |              |              |              |              |              |
|------------|-----|-------|-----------|-------------------|--------------------------------------------|----------------------------------------------------------------------------------------------------------------------------------------------------------------------------------------------------------------------|---------|-------|--------------|--------------|--------------|--------------|--------------|
|            |     |       | 0         | Not sequenced     | This study                                 |                                                                                                                                                                                                                      |         |       |              |              |              |              |              |
|            |     |       | 23        | EPI_ISL_11897513  | This study                                 | BA.1: A67V, T95I, Y145D, L212I, G339D, S371L, S373P, S375F, K417N, N440K, G446S, S477N, T478K, E484A, Q493R, G496S, Q498R, N501Y, Y505H, T547K, D614G, H655Y, N679K, P681H, N764K, D796Y, N856K, Q954H, N969K, L981F |         |       |              |              |              |              |              |
| P1         | M   | 61-65 | 40        | EPI_ISL_11897516  | This study                                 | R346T                                                                                                                                                                                                                |         | K458M | <b>A484V</b> |              |              |              |              |
|            |     |       | 48        | EPI_ISL_11178997  | This study                                 | R346T                                                                                                                                                                                                                |         | K458M | <b>A484V</b> |              |              |              |              |
|            |     |       | 64        | EPI_ISL_11179080  | This study                                 | L176F                                                                                                                                                                                                                | R346T   |       | K458M        | <b>A484V</b> | <b>H681Y</b> |              |              |
|            |     |       | 72        | EPI_ISL_11685451  | This study                                 | E96D                                                                                                                                                                                                                 | R346T   | L455W | K458M        | <b>A484V</b> |              |              |              |
|            |     |       | 81        | EPI_ISL_11897525  | This study                                 | L176F                                                                                                                                                                                                                | R346T   | L455W | K458M        | S477D        | <b>A484V</b> | <b>H681Y</b> |              |
| P2         | F   | 66-70 | 76        | EPI_ISL_11685480  | This study                                 | E96D                                                                                                                                                                                                                 | R346T   | L455W | K458M        | <b>A484V</b> | S680A        |              |              |
| P3         | M   | 36-40 | 101       | EPI_ISL_12422465  | This study                                 | E96D                                                                                                                                                                                                                 | R346T   | L455W | K458M        | <b>A484V</b> | <b>H681R</b> |              |              |
|            |     |       | 114       | EPI_ISL_12711034  | This study                                 | E96D                                                                                                                                                                                                                 | R346T   | L455W | K458M        | <b>A484V</b> | <b>H681R</b> |              |              |
| P4         | F   | 61-65 | 104       | Pending           | This study                                 | E96D                                                                                                                                                                                                                 | R346R/T | S371F | L455W        | K458M        | <b>A484V</b> | T547T/K      | <b>H681R</b> |
|            |     |       | 125       | Pending           | This study                                 | E96D                                                                                                                                                                                                                 | R346T   | V445A | L455W        | K458M        | <b>A484V</b> | <b>H681R</b> |              |
|            | F   | 66-70 | 79        | EPI_ISL_11696379  | Howard et al. 2022, CDC. (www.gisaid.org/) | E96D                                                                                                                                                                                                                 | R346T   |       | L455W        | K458M        | <b>A484V</b> | <b>H681R</b> |              |
|            | M   | 66-70 | 78        | EPI_ISL_11628400  |                                            | E96D                                                                                                                                                                                                                 | R346T   |       | L455W        | K458M        | <b>A484V</b> | <b>H681R</b> |              |

288 FIGURES

A

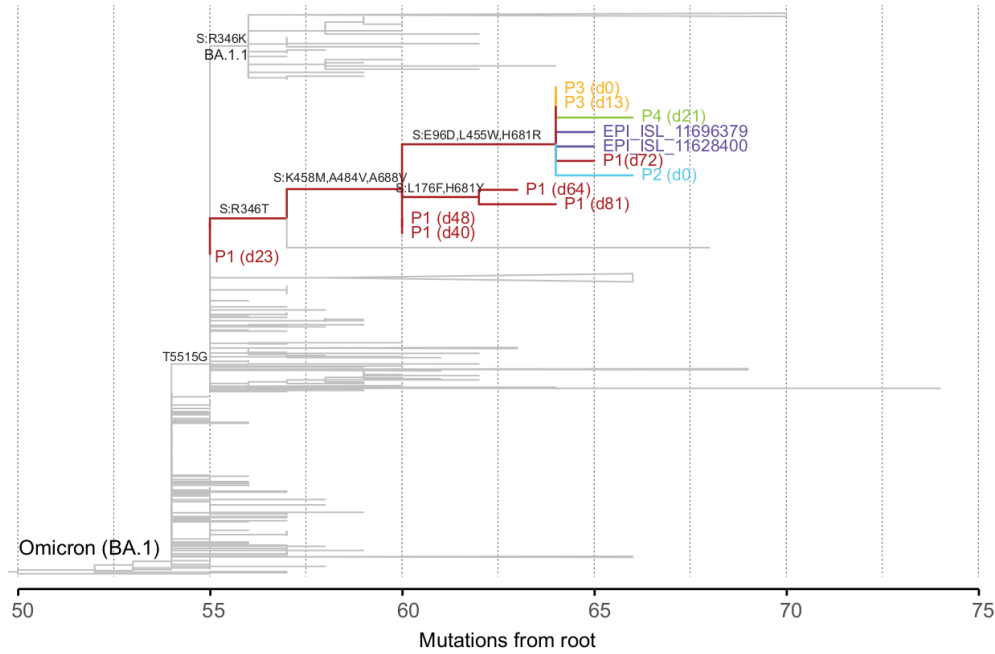

B

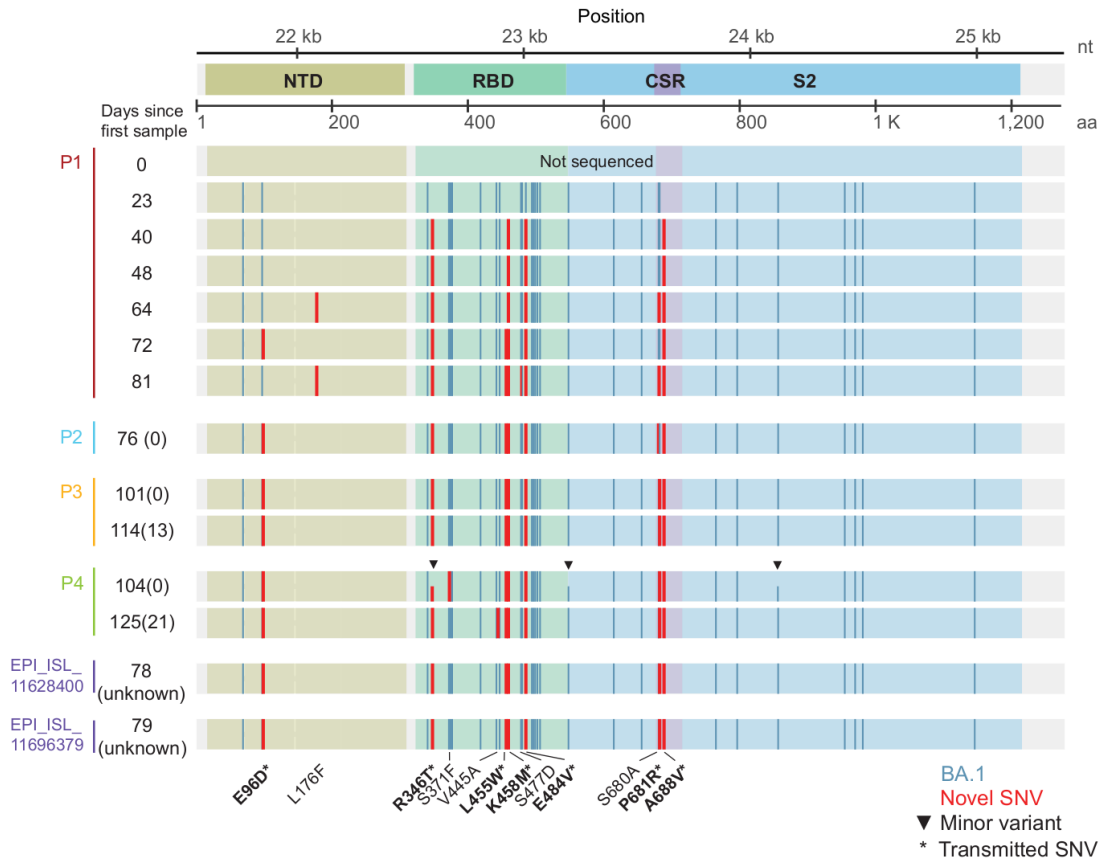

290 **Figure 1. Intrahost emergence and forward transmission of an Omicron BA.1**  
291 **subvariant**

292 **A)** Maximum likelihood phylogenetic subtree with SARS-CoV-2 (BA.1) sequences from  
293 the prolonged-infection case and forward transmissions, in a global background of  
294 sequences available in GISAID. Patients are depicted in different colors and the  
295 number of days after the first SARS-CoV-2 positive specimen is indicated in  
296 brackets. Sibling clusters of BA.1 and other sublineages are collapsed for easier  
297 visualization. The x-axis shows the number of nucleotide substitutions relative to the  
298 root of the phylogenetic tree.

299 **B)** Nucleotide and amino acid substitutions in the spike protein observed in sequential  
300 specimens obtained from patient 1 (P1) with prolonged infection with BA.1 and  
301 transmission cases (P2, P3 and P4). P1 shows progressive accumulation of  
302 mutations in the N-terminal domain (NTD), receptor binding domain (RBD), and  
303 cleavage site region (CSR); The same constellation of mutations was subsequently  
304 detected in three documented transmission cases (P2, P3 and P4) and in two  
305 sequences from GISAID (EPI\_ISL\_11628400 and EPI\_ISL\_11696379). The number  
306 of days since the first positive test in P1 is shown on the left, with the number of  
307 days after the first positive test for each patient between brackets. The BA.1  
308 substitutions are shown in blue and novel substitutions are shown in red, relative to  
309 the reference genome sequence NC\_045512.2. Positions with minor single  
310 nucleotide variants at the relevant positions are indicated.

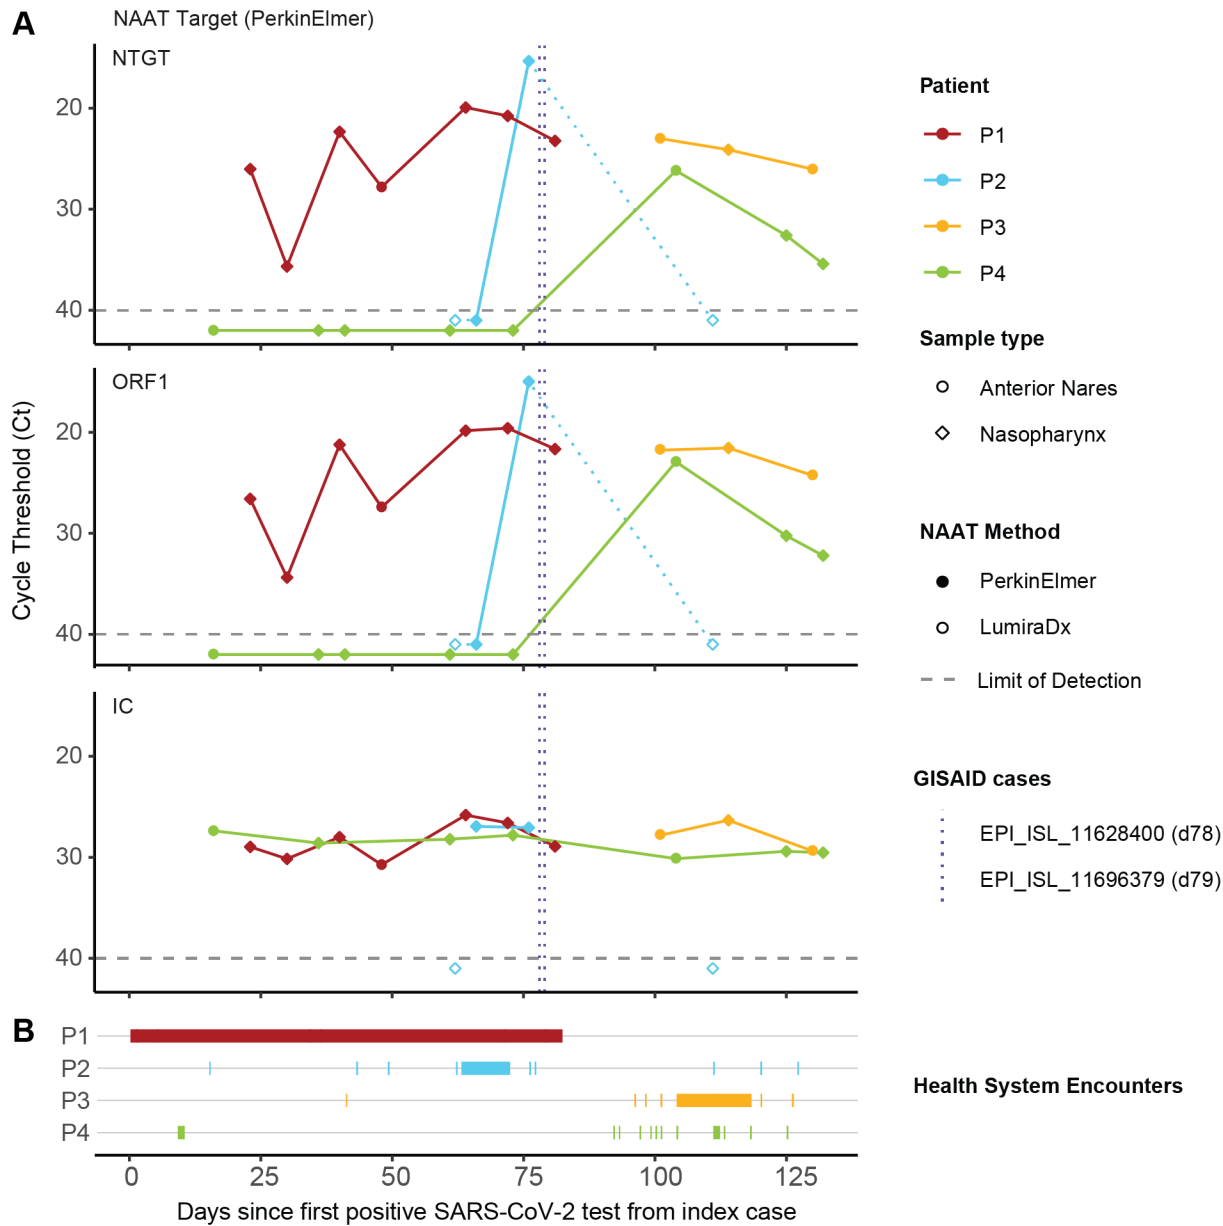

311

312

313 **Figure 2: Overview of the longitudinal SARS-CoV-2 viral load estimates and the**  
 314 **clinical encounters for the four cases captured by the MS-PSP.**

315 **A)** PerkinElmer® Real-time RT-PCR SARS-CoV-2 cycle threshold (Ct) values for  
 316 nasopharyngeal and anterior nares specimens. The horizontal dashed line  
 317 represents the cutoff value for a positive result. Vertical lines represent the sampling  
 318 days of the cases recorded in GISAID relative to P1's first positive test. For P2, the

319 negative tests by alternative diagnostic method (LumiraDx™) with no Ct value  
320 available, are indicated with empty markers. NTGT: N gene, ORF1: ORF1ab gene,  
321 IC: Internal Control.

322 **B)** Timeline of the encounters of P1, P2, P3 and P4 with the health system. Each tick  
323 represents an individual hospital encounter while the horizontal bars denote hospital  
324 admissions (duration is indicated by the length of the bar).





326 **Figure 3: Summary of the SARS-CoV-2 minority viral variant distribution within**  
327 **diagnostic nasal biospecimen.**

328 The distribution of nucleotide variants below the consensus level for positions that  
329 changed over the course of the infection of the index and transmitted infections are  
330 shown. Single nucleotide variants (SNVs) are colored by strain. The dotted bars indicate  
331 positions with coverage below the threshold of 100X coverage for calling minority  
332 variants. The positions with minority variants present at frequencies  $> 0.1\%$  are  
333 indicated with triangles for their respective samples.

334

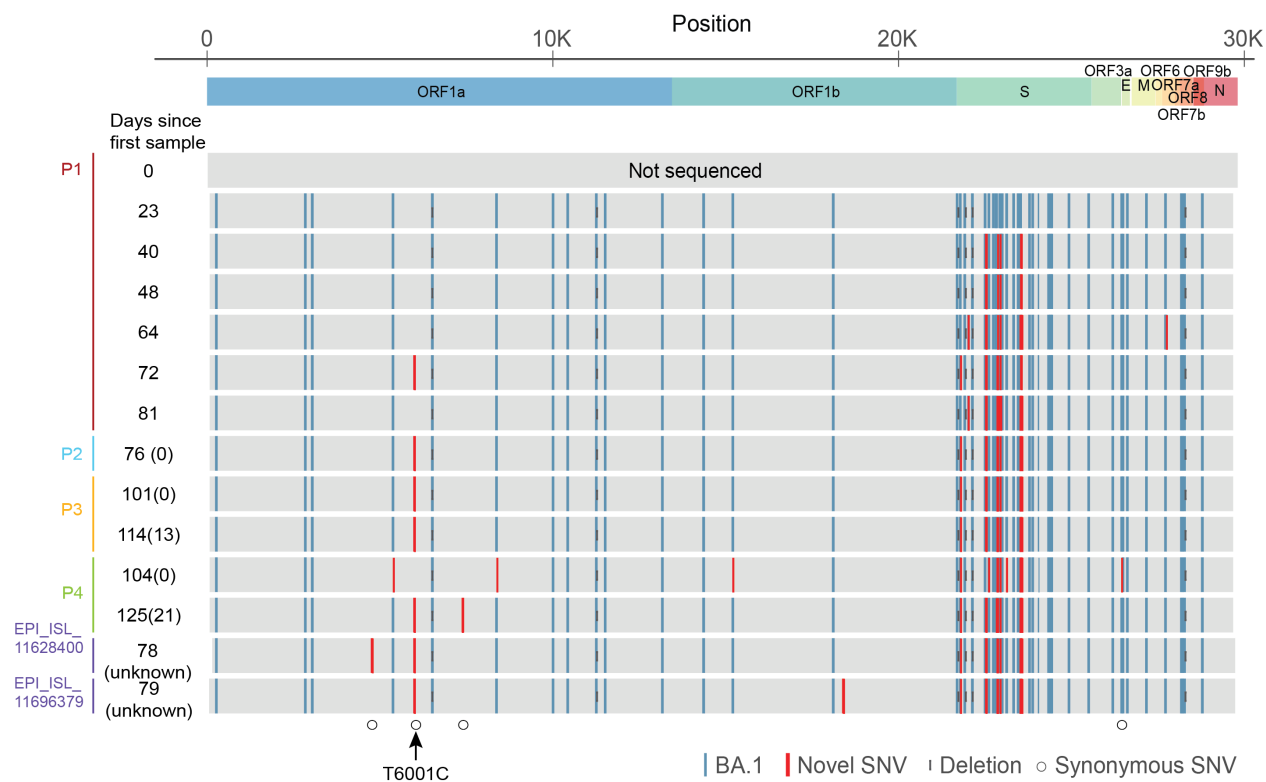

335

336 **Figure 4: Overview of genome-wide SARS-CoV-2 mutations found in the**  
337 **diagnostic nasal biospecimen.**

338 The mutations present across the complete SARS-CoV-2 genome are shown.  
339 Nucleotide substitutions observed in sequential specimens obtained from patient 1 (P1)  
340 with prolonged infection with BA.1 and forward transmission cases (P2, P3 and P4).  
341 There is accumulation and fixation of new SNVs in the spike region in P1.

342 The same constellation of mutations was subsequently detected in three documented  
343 transmission cases (P2, P3 and P4) and in two sequences from GISAID  
344 (EPI\_ISL\_11628400 and EPI\_ISL\_11696379). The only shared synonymous SNV  
345 outside of the spike (ORF1a:T6001C) is indicated with an arrow.

346 The number of days since the first positive test in P1 is shown on the left, with the  
347 number of days after the first positive test for each patient between brackets. The BA.1  
348 substitutions are shown in blue and novel substitutions are shown in red, relative to the  
349 reference genome sequence NC\_045512.2.
